# Supplementary material
Source: PubMed Central journal article supplement (PMC8751791)
Supplement: glab225_suppl_supplementary_materials.pdf [file glab225_suppl_supplementary_materials.pdf]

## Online-Only Supplementary Material

eFigure 1. Distribution of FI scores among 19,110 ASPREE participants at baseline (upper panel) and, among 11,361 ASPREE participants with available scores at baseline and year 4 follow-up (lower panel).

eFigure 2: Frailty Index score at study entry according to age, and with the best fitting linear line and 95% confidence interval, separately for men ( $R^2=0.034$ ) and women ( $R^2=0.052$ ).

eFigure 3: Frailty Index Score according to Fried frailty phenotype categories.

eFigure 4: Cumulative incidence of Disability-free survival (DFS) according to Frailty Index (FI) score categorised into seven groups based on 0.05 change in FI. The Hazard Ratio (HR) and 95% CI is shown, relative to the group with a FI score of 0.

eFigure 5: Mean Frailty Index trajectory in participants who reached the DFS endpoint and those who did not.

eTable 1. The 67-Item ASPREE Frailty Index.

eTable 2. Summary statistics of the ASPREE Frailty Index score across follow-up, for men (top) and women separately.

eTable 3: The comparison (n; %) between participants classified as pre-frail and frail defined using the FI and the Fried phenotype.

eTable 4. Cox proportional hazards regression for the association between ASPREE Frailty Index score and persistent physical disability endpoint over a median 4.7 years, when FI scores were grouped into seven categories (n=19,110).

eTable 5. Cox proportional hazards regression for the association between Frailty Index score at baseline and the ASPREE composite primary endpoint (DFS) and persistent physical disability endpoint over a median 4.7 years (n=19,110).

eTable 6. Hazard ratios (95% confidence intervals) from multivariable Cox proportional hazards regression for the association between Frailty index and the ASPREE composite primary endpoint (DFS)<sup>a</sup> across different ethno-racial groups.

eTable7: The risk of the composite DFS<sup>1</sup>, and persistent physical disability endpoints associated with Frailty Index and Fried phenotype, when considered together in adjusted multivariate models (n=18,629<sup>2</sup>).

eTable8. Separate multivariate<sup>a</sup> Cox proportional hazards regression for the association between Frailty Index and Fried phenotype at baseline and the ASPREE composite primary endpoint (DFS)<sup>1</sup>, and persistent physical disability endpoints over a median 4.7 years (n=19,110).

eTable 9. Cox proportional hazards regression<sup>1</sup> for the association between composite frailty category<sup>2</sup> and the ASPREE composite primary endpoint (DFS) over a median 4.7 years (n=18,629).

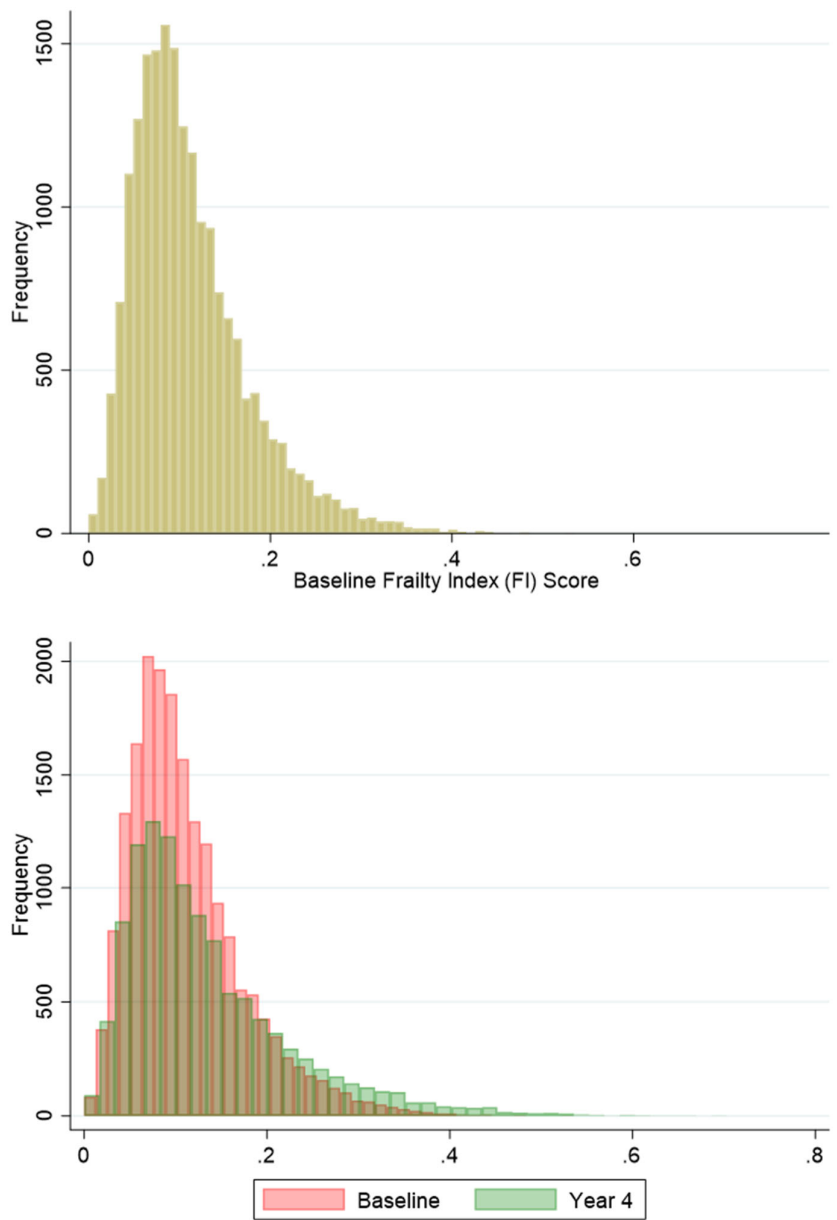

**eFigure 1. Distribution of FI scores among 19,110 ASPREE participants at baseline (upper panel) and, among 11,361 ASPREE participants with available scores at baseline and year 4 follow-up (lower panel).**

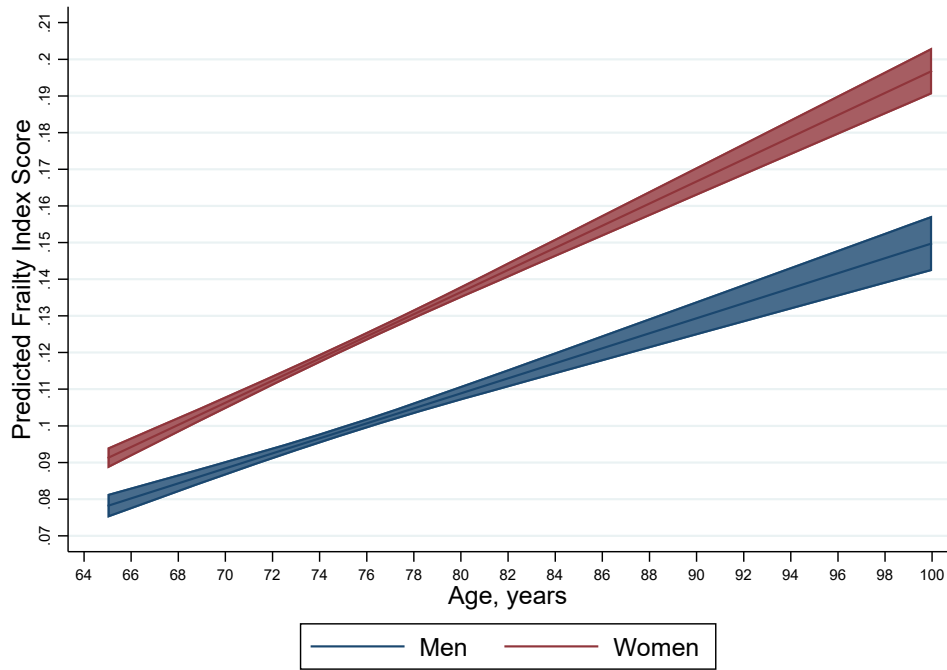

**eFigure 2: Frailty Index score at study entry according to age, and with the best fitting linear line and 95% confidence interval, separately for men (R<sup>2</sup>=0.034) and women (R<sup>2</sup>=0.052).**

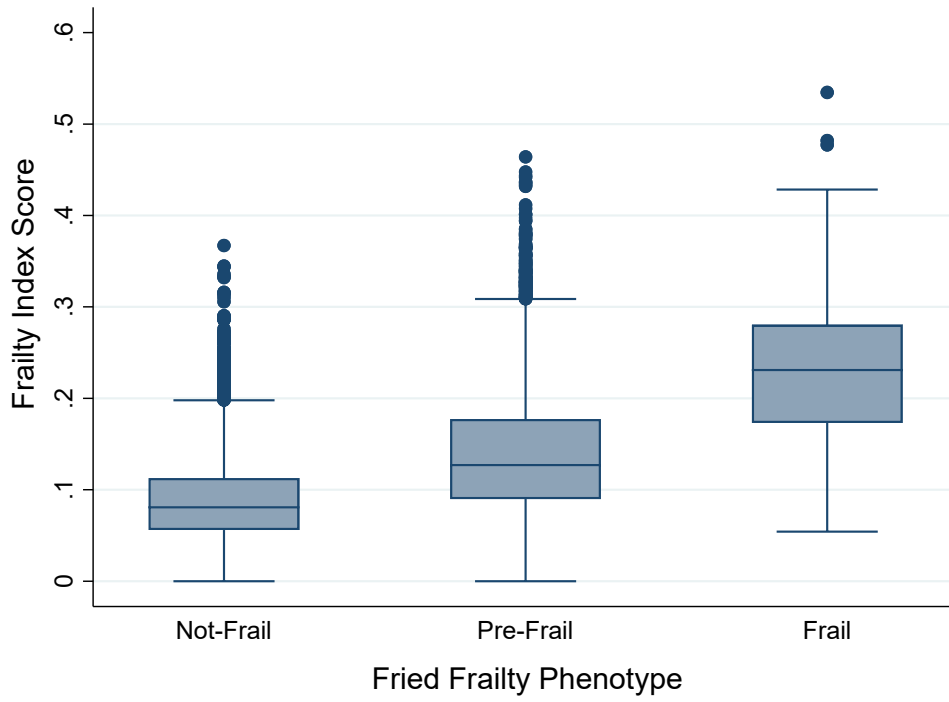

**eFigure 3: Frailty Index Score according to Fried frailty phenotype categories.**

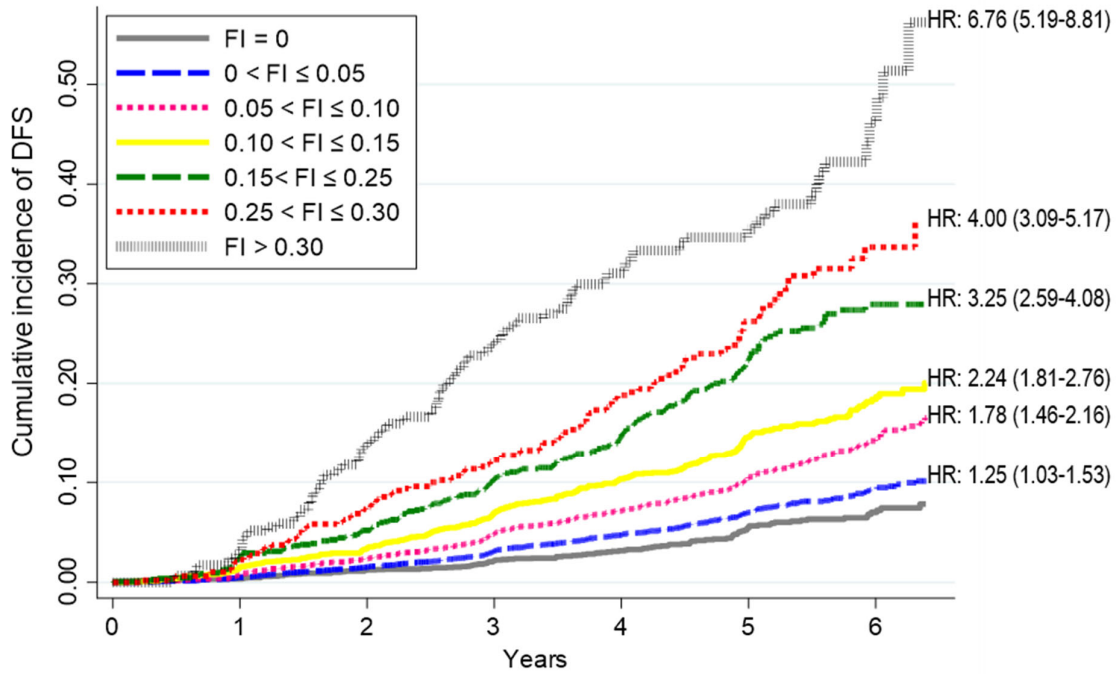

**eFigure 4: Cumulative incidence of Disability-free survival (DFS) according to Frailty Index (FI) score categorised into seven groups based on 0.05 change in FI. The Hazard Ratio (HR) and 95% CI is shown, relative to the group with a FI score of 0.**

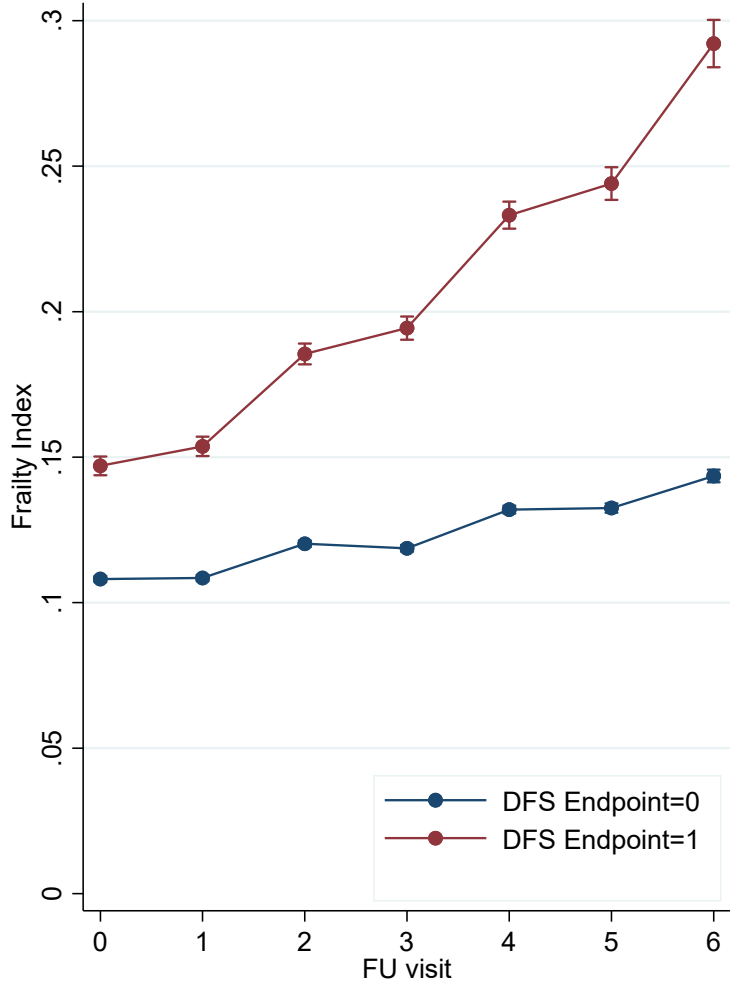

**eFigure 5: Mean Frailty Index trajectory in participants who reached the DFS endpoint and those who did not.**

**eTable 1. The 67-Item ASPREE Frailty Index.**

| <b>Health deficit</b>               | <b>Source</b>                             | <b>Scoring &amp; cut-offs</b>                                                                |
|-------------------------------------|-------------------------------------------|----------------------------------------------------------------------------------------------|
| <b>Disease diagnosis (11)</b>       |                                           |                                                                                              |
| Cancer                              | ASPREE endpoint (self-report at baseline) | No = 0; Past cancer at baseline = 0.5; Yes = 1                                               |
| Depression (CES-D-10 score)         | ASPREE endpoint                           | ≤ 7 = 0; 8-11 = 0.5; ≥12 or hospitalization for depression = 1                               |
| Diabetes                            | Clinical measure & drugs                  | No = 0; Yes = 1                                                                              |
| Stroke (ischemic or hemorrhagic)    | ASPREE endpoint                           | No = 0; Yes = 1                                                                              |
| Major Hemorrhage (excluding stroke) | ASPREE endpoint                           | No = 0; Yes = 1                                                                              |
| Myocardial infarction               | ASPREE endpoint                           | No = 0; Yes = 1                                                                              |
| Gastroesophageal reflux disease     | Self-report                               | No = 0; Yes = 1                                                                              |
| Hospitalization for heart failure   | ASPREE endpoint                           | No = 0; Yes = 1                                                                              |
| Osteoarthritis                      | Self-report                               | No = 0; Yes = 1                                                                              |
| Osteoporosis                        | Prescription drugs                        | No = 0; Yes = 1                                                                              |
| Urinary incontinence                | Prescription drugs                        | No = 0; Yes = 1                                                                              |
| <b>Disease indicators (13)</b>      |                                           |                                                                                              |
| Albuminuria                         | Clinical measure                          | No = 0; micro = 0.5; macro = 1                                                               |
| Anemia                              | Clinical measure                          | No = 0; Yes = 1 (men <13g/dl & women <12 g/dl)                                               |
| Central adiposity                   | Clinical measure                          | No = 0; Yes = 1 (>105cm men & >88cm women)                                                   |
| Dyslipidemia                        | Clinical & drugs                          | No = 0; Yes = 1                                                                              |
| Hospitalizations in last year       | Medical reports                           | 0 = 0; 1-4 = 0.33; 5-9 = 0.67; ≥10 = 1                                                       |
| Hypertension                        | Clinical measure                          | SBP <140mmHg = 0; 140-159 = 0.33; 160-179 = 0.67; ≥ 180 = 1                                  |
| Hypotension                         | Clinical measure                          | No = 0, Yes = 1 (SBP <100 mg Hg)                                                             |
| Number of Drugs                     | Prescription drugs                        | 0 = 0; 1-4 = 0.33; 5-9 = 0.67; ≥10 = 1                                                       |
| Obesity                             | Clinical measure                          | BMI <30 = 0; BMI ≥ 30 kg/m <sup>2</sup> ;                                                    |
| Chronic Kidney Disease              | Clinical measure                          | No = 0; Yes = 1 (Estimated Glomerular Filtration Rate, eGFR <60)                             |
| Self-rated health status            | SF-12 questionnaire                       | 0 = excellent; 0.25 = very good; 0.5 = good; 0.75 = fair; 1 = poor                           |
| Smoking                             | Self-report                               | Never = 0; Past = 0.5; Current = 1                                                           |
| Underweight                         | Clinical measure                          | No = 0; Yes = 1 (BMI < 18.5 kg/m <sup>2</sup> )                                              |
| <b>Functional status (26)</b>       |                                           |                                                                                              |
| Difficulty with bathing             | ADL questionnaire                         | None = 0; a little = 0.25; some = 0.5; a lot = 0.75; unable to do or requires assistance = 1 |
| Difficulty with dressing            | ADL questionnaire                         | None = 0; a little = 0.25; some = 0.5; a lot = 0.75; unable to do or requires assistance = 1 |
| Difficulty with eating              | ADL questionnaire                         | None = 0; a little = 0.25; some = 0.5; a lot = 0.75; unable to do or requires assistance = 1 |

| <b>Health deficit</b>                            | <b>Source</b>       | <b>Scoring &amp; cut-offs</b>                                                                |
|--------------------------------------------------|---------------------|----------------------------------------------------------------------------------------------|
| Difficulty with toileting                        | ADL questionnaire   | None = 0; a little = 0.25; some = 0.5; a lot = 0.75; unable to do or requires assistance = 1 |
| Difficulty with transferring                     | ADL questionnaire   | None = 0; a little = 0.25; some = 0.5; a lot = 0.75; unable to do or requires assistance = 1 |
| Difficulty walking                               | ADL questionnaire   | None = 0; a little = 0.25; some = 0.5; a lot = 0.75; unable to do or requires assistance = 1 |
| Accomplished less                                | SF-12 questionnaire | None = 0; a little = 0.25; some = 0.50; most = 0.75; always = 1                              |
| Climbing stairs limited                          | SF-12 questionnaire | No = 0; a little = 0.5; a lot = 1                                                            |
| Limited in kind of work/activities               | SF-12 questionnaire | None = 0; a little = 0.25; some = 0.50; most = 0.75; always = 1                              |
| Moderate activities limited                      | SF-12 questionnaire | No = 0; a little = 0.5; a lot = 1                                                            |
| Pain interfere with work                         | SF-12 questionnaire | No = 0; a bit = 0.35; moderate = 0.5; quite a bit = 0.75; extreme = 5                        |
| Requires a walking aid                           | LIFE questions      | No = 0; Yes = 1                                                                              |
| Any walking outside                              | LIFE questions      | Yes = 0, No = 1                                                                              |
| Difficulty walking several blocks                | FAST questionnaire  | No=0, Yes=1                                                                                  |
| Difficulty walking 8-12 blocks                   | LIFE questions      | No=0, Yes=1                                                                                  |
| Difficulty climbing 1 flight of stairs           | FAST questionnaire  | None = 0; a little = 0.25; some = 0.5; a lot = 0.75; unable to do = 1                        |
| Difficulty getting into a car                    | FAST questionnaire  | None = 0; a little = 0.25; some = 0.5; a lot = 0.75; unable to do = 1                        |
| Difficulty gripping objects                      | FAST questionnaire  | None = 0; a little = 0.25; some = 0.5; a lot = 0.75; unable to do = 1                        |
| Difficulty lifting 10 pounds                     | FAST questionnaire  | None = 0; a little = 0.25; some = 0.5; a lot = 0.75; unable to do = 1                        |
| Difficulty lifting heavy objects                 | FAST questionnaire  | None = 0; a little = 0.25; some = 0.5; a lot = 0.75; unable to do = 1                        |
| Difficulty raising arms above head               | FAST questionnaire  | None = 0; a little = 0.25; some = 0.5; a lot = 0.75; unable to do = 1                        |
| Difficulty running errands                       | FAST questionnaire  | None = 0; a little = 0.25; some = 0.5; a lot = 0.75; unable to do = 1                        |
| Difficulty walking 1 block                       | FAST questionnaire  | None = 0; a little = 0.25; some = 0.5; a lot = 0.75; unable to do = 1                        |
| Difficulty with light housework                  | FAST questionnaire  | None = 0; a little = 0.25; some = 0.5; a lot = 0.75; unable to do = 1                        |
| Difficulty with meal preparation                 | FAST questionnaire  | None = 0; a little = 0.25; some = 0.5; a lot = 0.75; unable to do = 1                        |
| Difficulty with shopping                         | LIFE questions      | No=0, Yes=1                                                                                  |
| <b>Mental &amp; Psychosocial (11)</b>            |                     |                                                                                              |
| Accomplished less due to emotional problems      | SF-12 questionnaire | None = 0; a little = 0.25; some = 0.50; most = 0.75; always = 1                              |
| A lot of energy                                  | SF-12 questionnaire | Always = 0; most = 0.25; some = 0.50; a little = 0.75; never = 1                             |
| Calm or peaceful                                 | SF-12 questionnaire | Always = 0; most = 0.25; some = 0.50; a little = 0.75; never = 1                             |
| Difficulty participating in community activities | FAST questionnaire  | None = 0; a little = 0.25; some = 0.5; a lot = 0.75; unable to do = 1                        |
| Difficulty taking care of family                 | FAST questionnaire  | None = 0; a little = 0.25; some = 0.5; a lot = 0.75; unable to do = 1                        |
| Difficulty using the telephone                   | FAST questionnaire  | None = 0; a little = 0.25; some = 0.5; a lot = 0.75; unable to do = 1                        |
| Difficulty with financial management             | FAST questionnaire  | None = 0; a little = 0.25; some = 0.5; a lot = 0.75; unable to do = 1                        |



| <b>Health deficit</b>                  | <b>Source</b>        | <b>Scoring &amp; cut-offs</b>                                                     |
|----------------------------------------|----------------------|-----------------------------------------------------------------------------------|
| Difficulty visiting relatives/friends  | FAST questionnaire   | None = 0; a little = 0.25; some = 0.5; a lot = 0.75; unable to do = 1             |
| Downhearted and depressed              | SF-12 questionnaire  | None = 0; a little = 0.25; some = 0.50; most = 0.75; always = 1                   |
| Less careful in work/activities        | SF-12 questionnaire  | None = 0; a little = 0.25; some = 0.50; most = 0.75; always = 1                   |
| Social activities impacted by health   | SF-12 questionnaire  | None = 0; a little = 0.25; some = 0.50; most = 0.75; always = 1                   |
| <b>Cognition &amp; Performance (6)</b> |                      |                                                                                   |
| Episodic memory, delayed recall        | HVLT-R questionnaire | No = 0, Yes=1 [ $\leq 4$ at baseline or $>1.5SD$ decline over follow-up]          |
| Low Global cognition                   | 3MS questionnaire    | No = 0, Yes=1 [ $< 78$ or decline $>10$ -point decline over follow-up]            |
| Low Psychomotor Speed                  | SDMT questionnaire   | No = 0, Yes=1 [ $\leq 14$ at baseline or $>1.5SD$ decline over follow-up]         |
| Low Language and Executive Function    | COWAT questionnaire  | No = 0, Yes=1 [ $\leq 7$ at baseline or $>1.5SD$ decline over follow-up]          |
| Slow Gait speed over 3 meters          | Clinical measure     | No = 0; Yes = 1 [Lowest quintile defined at baseline according to sex and height] |
| Weak handgrip strength                 | Clinical measure     | No = 0; Yes = 1 [Lowest quintile defined at baseline according to sex and BMI]    |

Notes: 3MS: Modified Mini-Mental State Examination; ADL: Activity of Daily Living; BMI: Body mass index, calculated based on measured weight (kg) and height (m<sup>2</sup>); CES-D: Center for the Epidemiologic Studies Depression scale; COWAT: Controlled Oral Word Association Test; HVLT-R: Hopkins Verbal Learning Test Revised; SBP: Systolic Blood Pressure; SDMT: Symbol Digit Modalities Test; SF-12: 12-item short-form questionnaire

**eTable 2. Summary statistics of the ASPREE Frailty Index score across follow-up, for men (top) and women separately.**

| <b>MEN</b>                    | <b>Baseline</b>  | <b>Year 1</b>    | <b>Year 2</b>    | <b>Year 3</b>    | <b>Year 4</b>    | <b>Year 5</b>    | <b>Year 6</b>    |
|-------------------------------|------------------|------------------|------------------|------------------|------------------|------------------|------------------|
| N                             | 8,331            | 7,922            | 7,595            | 6,598            | 4,910            | 3,075            | 1,092            |
| Mean (SD)                     | 0.10 (0.06)      | 0.10 (0.07)      | 0.11 (0.07)      | 0.11 (0.07)      | 0.12 (0.08)      | 0.12 (0.08)      | 0.13 (0.08)      |
| Median (25-75%)               | 0.09 (0.06-0.13) | 0.09 (0.06-0.13) | 0.09 (0.06-0.13) | 0.09 (0.06-0.14) | 0.10 (0.06-0.15) | 0.10 (0.06-0.15) | 0.10 (0.06-0.16) |
| 99% submaximal                | 0.29             | 0.34             | 0.38             | 0.37             | 0.40             | 0.43             | 0.43             |
| FI pre-frail <sup>1</sup> (%) | 35.6%            | 31.8%            | 34.6%            | 35.0%            | 35.7%            | 35.7%            | 38.3%            |
| FI frail <sup>2</sup> (%)     | 4.7%             | 6.5%             | 8.4%             | 9.0%             | 11.5%            | 12.2%            | 12.9%            |
| <b>WOMEN</b>                  |                  |                  |                  |                  |                  |                  |                  |
| N                             | 10,779           | 10,168           | 9,706            | 8,501            | 6,451            | 4,107            | 1,591            |
| Mean (SD)                     | 0.12 (0.07)      | 0.13 (0.08)      | 0.14 (0.09)      | 0.14 (0.09)      | 0.15 (0.10)      | 0.15 (0.09)      | 0.15 (0.10)      |
| Median (25-75%)               | 0.11 (0.07-0.16) | 0.11 (0.07-0.16) | 0.12 (0.08-0.18) | 0.11 (0.08-0.18) | 0.12 (0.08-0.20) | 0.13 (0.08-0.20) | 0.13 (0.08-0.19) |
| 99% submaximal                | 0.34             | 0.39             | 0.42             | 0.41             | 0.46             | 0.45             | 0.48             |
| FI pre-frail <sup>1</sup> (%) | 35.6%            | 40.5%            | 41.2%            | 41.0%            | 40.9%            | 41.5%            | 43.1%            |
| FI frail <sup>2</sup> (%)     | 4.7%             | 13.5%            | 17.1%            | 17.4%            | 21.1%            | 21.5%            | 20.6%            |

<sup>1</sup>An FI score > 0.1 and ≤ 0.21.

<sup>2</sup>An FI score >0.21.

**eTable 3: The comparison between participants classified as pre-frail and frail defined using the FI and the Fried phenotype.**

| Fried frailty phenotype <sup>1</sup> |      | Frailty Index (FI)        |                                 |                       |
|--------------------------------------|------|---------------------------|---------------------------------|-----------------------|
|                                      |      | Not frail ( $\leq 0.10$ ) | Pre-frail ( $>0.10$ & $<0.21$ ) | Frail ( $\geq 0.21$ ) |
| Not frail (0 components)             | n; % | 7236; 66.2%               | 3541; 32.4%                     | 159; 1.4%             |
| Pre-frail (1-2 components)           | n; % | 2337; 32.1%               | 3862; 53.1%                     | 1078; 14.8%           |
| Frail (3+ components)                | n; % | 19; 4.6%                  | 149; 35.8%                      | 248; 59.6%            |

<sup>1</sup>Cut-offs were used to define pre-frail and frail according to modified Fried frailty phenotype, as previously <sup>1</sup>.  
Chi-square  $p < 0.0001$

**eTable 4. Cox proportional hazards regression for the association between ASPREE Frailty Index score and persistent physical disability endpoint over a median 4.7 years, when FI scores were grouped into seven categories (n=19,110).**

| Frailty Index score | Events n (%) | HR per 0.01 (95% CI), p      |
|---------------------|--------------|------------------------------|
| FI = 0              | 14 (3.4)     | 1.00 [Ref]                   |
| 0 < FI ≤ 0.05       | 44 (10.7)    | 1.11 (0.61-2.03, p=0.73)     |
| 0.05 < FI ≤ 0.10    | 76 (18.5)    | 2.64 (1.49-4.67), p=0.001    |
| 0.10 < FI ≤ 0.15    | 82 (19.9)    | 5.89 (3.33-10.40), p<0.001   |
| 0.15 < FI ≤ 0.25    | 84 (20.4)    | 14.10 (7.97-24.95), p<0.001  |
| 0.25 < FI ≤ 0.30    | 45 (10.9)    | 17.15 (9.38-31.37), p<0.001  |
| FI > 0.30           | 67 (16.3)    | 48.23 (26.96-86.27), p<0.001 |

Notes: Models were adjusted for age and gender.

**eTable 5. Cox proportional hazards regression for the association between Frailty Index score at baseline and the ASPREE composite primary endpoint (DFS)<sup>1</sup> and persistent physical disability endpoint over a median 4.7 years (n=19,110).**

|                            | <b>Primary Composite Endpoint (1,835 events)</b><br>HR (95% CI), p value | <b>Persistent Disability (412 events)</b><br>HR (95% CI), p value |
|----------------------------|--------------------------------------------------------------------------|-------------------------------------------------------------------|
| <b>Univariate</b>          |                                                                          |                                                                   |
| Frailty Index <sup>2</sup> | 1.08 (1.07 to 1.08), p<0.001                                             | 1.15 (1.14 to 1.16), p<0.001                                      |
| <b>Multivariable</b>       |                                                                          |                                                                   |
| Frailty Index <sup>2</sup> | 1.07 (1.06 to 1.08), p<0.001                                             | 1.15 (1.13 to 1.16), p<0.001                                      |
| Age, years                 | 1.10 (1.10 to 1.11), p<0.001                                             | 1.09 (1.07 to 1.10), p<0.001                                      |
| Male                       | 1.70 (1.56 to 1.88), p<0.001                                             | 1.61 (1.31 to 1.97), p<0.001                                      |
| Ethno-racial group         |                                                                          |                                                                   |
| White Australian           | 1 (reference)                                                            | 1 (reference)                                                     |
| White U.S.                 | 0.99 (0.82-1.18), p=0.88                                                 | 0.73 (0.49-1.11), p=0.14                                          |
| African-American           | 1.45 (1.18-1.79), p<0.001                                                | 0.92 (0.58-1.44), p=0.69                                          |
| Hispanic/Latino            | 1.09 (0.79-1.51), p=0.60                                                 | 1.04 (0.52-2.11), p=0.91                                          |
| Other                      | 0.90 (0.60-1.35), p=0.62                                                 | 0.15 (0.02-1.06), p=0.06                                          |

<sup>1</sup>The primary endpoint was a composite of death, dementia or physical disability.

<sup>2</sup>HR is per 0.01-unit

**eTable 6. Hazard ratios (95% confidence intervals) from multivariable Cox proportional hazards regression for the association between Frailty index and the ASPREE composite primary endpoint (DFS)<sup>1</sup> across different ethno-racial groups.**

|                              | <b>Australian white<br/>N=16,360<br/>HR (95% CI)</b> | <b>U.S. white<br/>N=1088<br/>HR (95% CI)</b> | <b>U.S. African-American<br/>N=899<br/>HR (95% CI)</b> | <b>U.S. Hispanic-Latino<br/>N=488<br/>HR (95% CI)</b> | <b>Other<br/>N=275<br/>HR (95% CI)</b> |
|------------------------------|------------------------------------------------------|----------------------------------------------|--------------------------------------------------------|-------------------------------------------------------|----------------------------------------|
| Frailty Index, per 0.01-unit | 1.07 (1.06-1.08)                                     | 1.06 (1.03-1.08)                             | 1.06 (1.03-1.09)                                       | 1.07 (1.02-1.12)                                      | 1.07 (1.06-1.08)                       |
| Age, year                    | 1.11 (1.10-1.12)                                     | 1.12 (1.08-1.15)                             | 1.07 (1.04-1.11)                                       | 1.10 (1.03-1.17)                                      | 1.11 (1.10-1.12)                       |
| Male                         | 1.66 (1.50-1.84)                                     | 1.64 (1.14-2.37)                             | 2.23 (1.46-3.41)                                       | 2.20 (1.13-4.27)                                      | 1.71 (1.56-1.88)                       |

<sup>1</sup>The primary endpoint was a composite of death, dementia or physical disability.

**eTable7: The risk of the composite DFS<sup>1</sup>, and persistent physical disability endpoints associated with Frailty Index and Fried phenotype, when considered together in adjusted multivariate models (n=18,629<sup>2</sup>).**

| <b>Combined</b>        | <b>DFS (1,776 events)</b>                | <b>Disability (394 events)</b>           |
|------------------------|------------------------------------------|------------------------------------------|
|                        | <u>HR per 0.1 unit (95% CI), p value</u> | <u>HR per 0.1 unit (95% CI), p value</u> |
| Frailty Index          | 1.72 (1.59 to 1.85), p<0.001             | 3.72 (3.27 to 4.23), p<0.001             |
| Fried phenotype        | 1.11 (1.08 to 1.15), p<0.001             | 1.07 (1.00 to 1.14), p=0.04              |
|                        | <u>HR (95% CI), p value</u>              | <u>HR (95% CI), p value</u>              |
| <b>Frailty Index</b>   |                                          |                                          |
| Not Frail              | 1.00 (Reference)                         | 1.00 (Reference)                         |
| Pre-frail              | 1.54 (1.38-1.73), <0.001                 | 3.47 (2.52-4.79), <0.001                 |
| Frail                  | 3.01 (2.58-3.52), <0.001                 | 16.4 (11.5-23.4), <0.001                 |
| <b>Fried phenotype</b> |                                          |                                          |
| Not Frail              | 1.00 (Reference)                         | 1.00 (Reference)                         |
| Pre-frail              | 1.46 (1.31-1.63), <0.001                 | 1.70 (1.30-2.20), <0.001                 |
| Frail                  | 2.05 (1.65-2.54), <0.001                 | 2.39 (1.60-3.56), <0.001                 |

<sup>1</sup>The primary endpoint was a composite of death, dementia or physical disability.

<sup>2</sup>481 participants were missing one of the components of the Fried frailty phenotype, and are thus not included here.

**eTable8. Separate multivariate<sup>a</sup> Cox proportional hazards regression for the association between Frailty Index and Fried phenotype at baseline and the ASPREE composite primary endpoint (DFS)<sup>1</sup>, and persistent physical disability endpoints over a median 4.7 years (n=19,110).**

|                                 | Frailty Index (n=19,110)                | Fried phenotype (n=18,629 <sup>4</sup> ) |
|---------------------------------|-----------------------------------------|------------------------------------------|
| <u>DFS<sup>2</sup></u>          | <u>HR<sup>3</sup> (95% CI), p value</u> | <u>HR<sup>3</sup> (95% CI), p value</u>  |
| Continuous measure <sup>3</sup> | 1.95 (1.84 to 2.07), p<0.001            | 1.25 (1.22 to 1.29), p<0.001             |
| Categorical measure             |                                         |                                          |
| Not Frail                       | 1.00 (Reference)                        | 1.00 (Reference)                         |
| Pre-frail                       | 1.73 (1.56 to 1.93), p<0.001            | 1.88 (1.68 to 2.06), p<0.001             |
| Frail                           | 3.91 (3.41 to 4.48), p<0.001            | 3.74 (3.07 to 4.55), p<0.001             |
| <u>DISABILITY</u>               | <u>HR<sup>3</sup> (95% CI), p value</u> | <u>HR<sup>3</sup> (95% CI), p value</u>  |
| Continuous measure <sup>3</sup> | 3.88 (3.52-4.28), <0.001                | 1.49 (1.42-1.56), <0.001                 |
| Categorical measure             |                                         |                                          |
| Not Frail                       | 1.00 (Reference)                        | 1.00 (Reference)                         |
| Pre-frail                       | 3.85 (2.85-5.19), <0.001                | 3.51 (2.78-4.45), <0.001                 |
| Frail                           | 21.15 (15.5-28.8), <0.001               | 11.3 (7.84-16.2), <0.001                 |

<sup>1</sup>The models were adjusted for age, sex and ethno-racial group.

<sup>2</sup>The primary endpoint was a composite of death, dementia or physical disability.

<sup>3</sup>HR is per 0.1-unit increase.

<sup>4</sup>481 participants were missing one of the components of the Fried frailty phenotype, and are thus not included here.



**eTable 9. Cox proportional hazards regression<sup>1</sup> for the association between composite frailty category<sup>2</sup> and the ASPREE composite primary endpoint (DFS) over a median 4.7 years (n=18,629).**

| <b>Composite Frailty Category</b>         | <b>Events n (%)</b> | <b>HR (95% CI), p</b>     |
|-------------------------------------------|---------------------|---------------------------|
| Not Frail both                            | 369 (11.2)          | 1.00 [Ref]                |
| Not Frail Index, Pre-Frail Fried          | 203 (18.6)          | 1.43 (1.20-1.70), p<0.001 |
| Pre-Frail Index, Not Frail Fried          | 270 (17.2)          | 1.55 (1.32-1.81), p<0.001 |
| Pre-Frail both                            | 530 (30.6)          | 2.20 (1.92-2.53), p<0.001 |
| Not Frail Index, Frail Fried <sup>3</sup> | 2 (24.8)            | 1.46 (0.36-5.87), p=0.60  |
| Frail Index, Not Frail Fried <sup>3</sup> | 16 (23.4)           | 2.23 (1.35-3.68), p=0.002 |
| Pre-Frail Index, Frail Fried              | 42 (65.7)           | 3.59 (2.59-4.97), p<0.001 |
| Frail Index, Pre-Frail Fried              | 259 (58.5)          | 4.53 (3.84-5.35), p<0.001 |
| Frail both                                | 85 (87.9)           | 5.82 (4.57-7.41), p<0.001 |

<sup>1</sup>Models were adjusted for age, gender and ethno-racial category.

<sup>2</sup>The composite frailty score considered categorization of participants into frailty status groups, based on both the FI and the Fried phenotype.

<sup>3</sup>The numbers of events in these discordant groups are very small, and the estimates are thus less likely to be reliable. These curves are thus not shown in Figure 3b.
